# Supplementary material for: VianniaTopes: a database of predicted immunogenic peptides forLeishmania(Viannia) species
Source: Oxford University Press journal article supplement (doi:10.1093/database/bay111), 2018-01-01
Supplement: bay111_suppl_information.pdf [file bay111_suppl_information.pdf]

## SUPPLEMENTARY INFORMATION

### **VianniaTopes: a database of predicted immunogenic peptides for *Leishmania* (*Viannia*) species**

Alejandro Llanes, Carlos Mario Restrepo, Ricardo Leonart

**Figure S1.** Frequency of the selected MHC alleles in the target geographical region.

**Figure S2.** Venn diagrams showing the distribution of epitope predictions by MHC class, method and selection scheme.

**Table S1.** Genes in potentially *Viannia*-specific ortholog groups.

**Table S2.** Potentially promiscuous peptides predicted to act as MHC-I and MHC-II epitopes derived from proteins within *Viannia*-specific ortholog groups.

**Table S3.** Peptides from previously published studies applying reverse vaccinology strategy to pathogenic *Leishmania* species, used in the validation of our prediction methodology.

**Table S4.** Peptides with positive experimental results in IEDB, reported in studies exclusively conducted on *L. braziliensis* or *L. panamensis*.

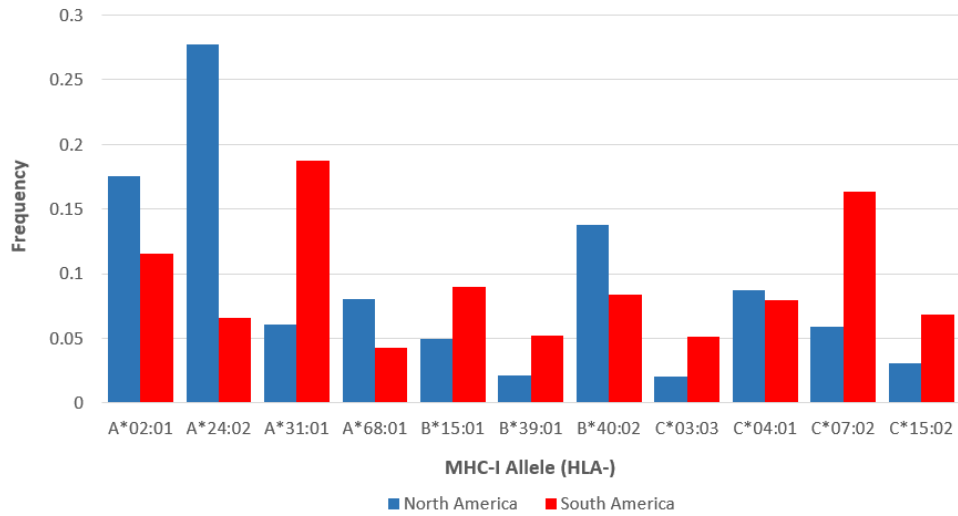

(A)

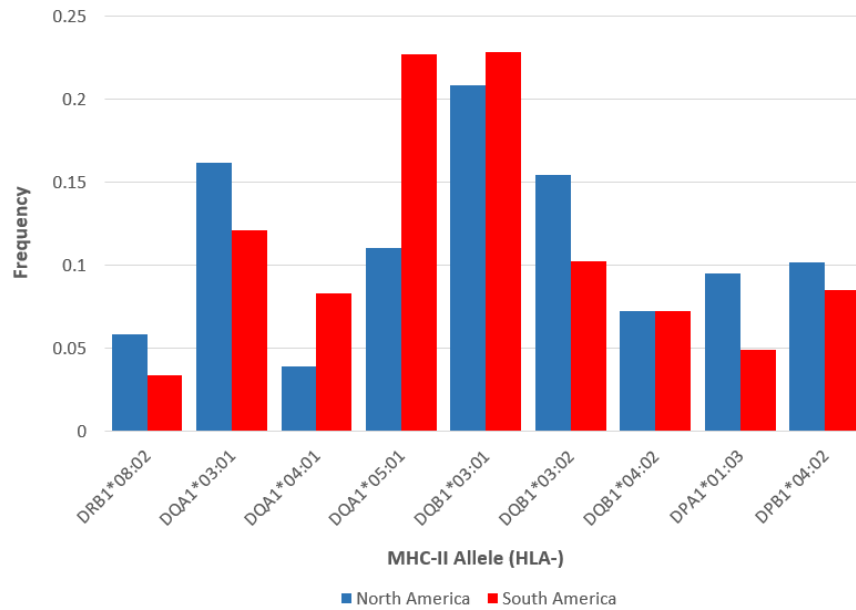

(B)

**Figure S1.** Frequency of the selected MHC alleles in the target geographical region. Figure shows the frequency of MHC-I (A) and MHC-II (B) alleles in the dbMHC database for North and South American populations.

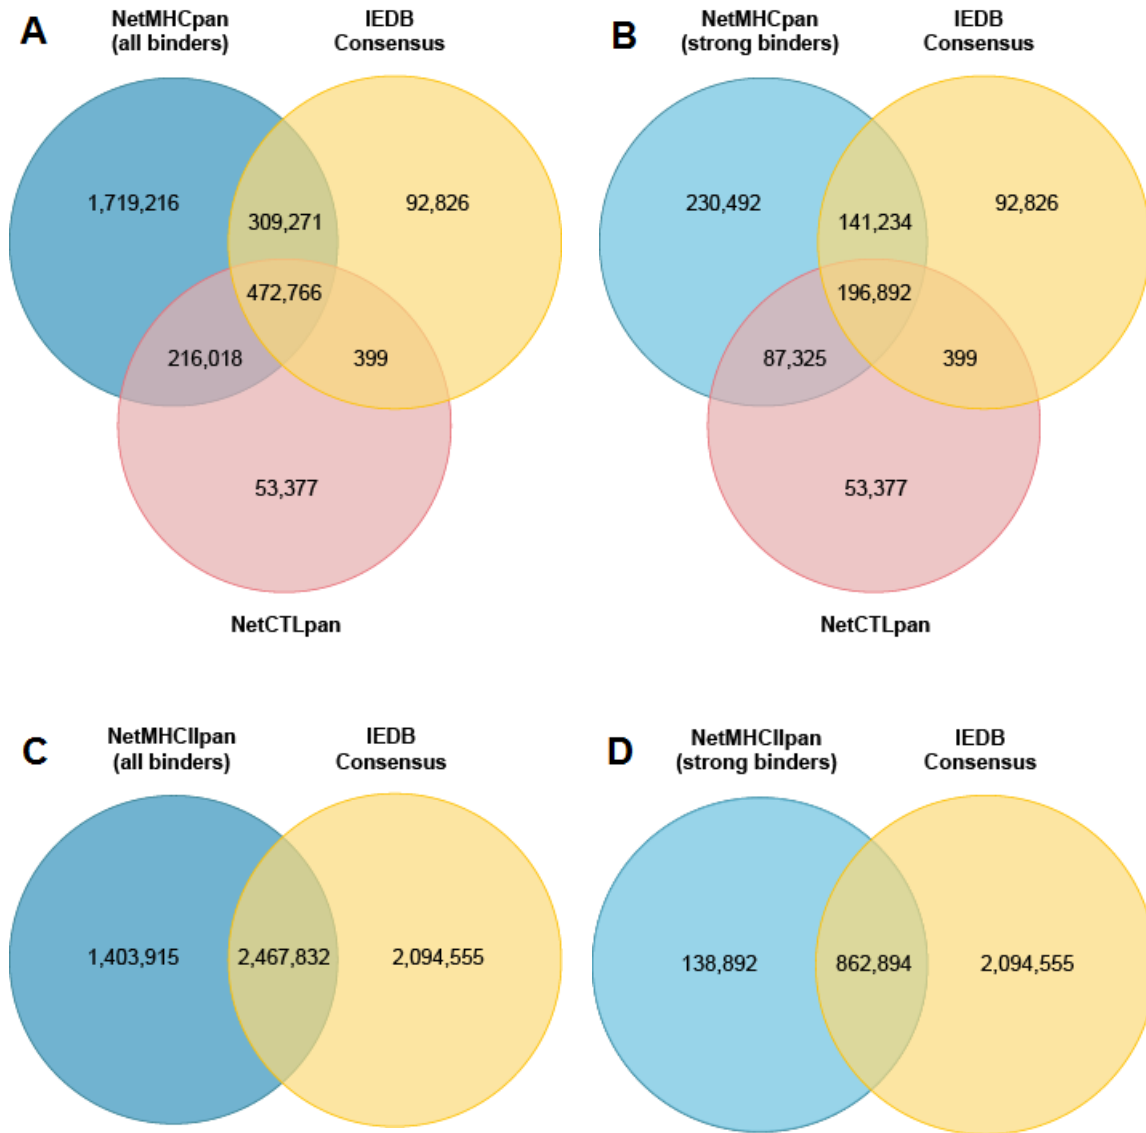

**Figure S2.** Venn diagrams showing the distribution of epitope predictions by MHC class, method and selection scheme. Figures show all the MHC-I binding predictions (**A**) and those with strong binders (**B**), as well as all the MHC-II binding predictions (**C**) and those with strong binders (**D**).

**Table S1. Genes in potentially *Viannia*-specific ortholog groups.**

| Group ID     | Putative function                            | Genes | Gene IDs                                                                                                                                                                                                                                                                                                 |
|--------------|----------------------------------------------|-------|----------------------------------------------------------------------------------------------------------------------------------------------------------------------------------------------------------------------------------------------------------------------------------------------------------|
| VIANNIA_0058 | hypothetical protein                         | 13    | LBRM2903_070016100.1<br>LBRM2903_070016200.1<br>LBRM2903_250008700.1<br>LBRM2903_270035000.1<br>LBRM2903_290010400.1<br>LBRM2903_350047900.1<br>LBRM2903_350048000.1<br>LPAL13_000010400.1<br>LPAL13_000038200.1<br>LPAL13_000041600.1<br>LPAL13_010009100.1<br>LPAL13_070014100.1<br>LPAL13_290009500.1 |
| VIANNIA_0471 | amastin-like protein                         | 7     | LBRM2903_200018900.1<br>LBRM2903_200019000.1<br>LPAL13_200016200.1<br>LPAL13_200030900.1<br>LPAL13_200050300.1<br>LpmP.20.1620<br>LpmP.20.1640                                                                                                                                                           |
| VIANNIA_0472 | beta-tubulin                                 | 6     | LbrM.33.1010<br>LBRM2903_330013900.1<br>LBRM2903_330014000.1<br>LPAL13_000036800.1<br>LPAL13_210025500.1<br>LPAL13_330013200.1                                                                                                                                                                           |
| VIANNIA_0765 | phosphoglycan beta 1,3 galactosyltransferase | 6     | LbrM.02.0240<br>LBRM2903_020007400.1<br>LBRM2903_320048000.1<br>LPAL13_020006600.1<br>LPAL13_020007000.1<br>LpmP.02.0140                                                                                                                                                                                 |
| VIANNIA_0766 | hypothetical protein                         | 6     | LbrM.25.0540<br>LBRM2903_150010200.1<br>LBRM2903_250014200.1<br>LPAL13_000040000.1<br>LPAL13_250012800.1<br>LpmP.25.0720                                                                                                                                                                                 |
| VIANNIA_0767 | hypothetical protein                         | 6     | LbrM.31.2370<br>LBRM2903_230023600.1<br>LBRM2903_310033200.1<br>LPAL13_230021800.1<br>LPAL13_310026500.1<br>LpmP.31.1960                                                                                                                                                                                 |
| VIANNIA_0768 | hypothetical protein                         | 6     | LbrM.32.0080<br>LBRM2903_200006800.1<br>LBRM2903_200034200.1<br>LBRM2903_320016700.1<br>LPAL13_000026400.1<br>LPAL13_200030500.1                                                                                                                                                                         |
| VIANNIA_0769 | ABC transporter, putative                    | 5     | LbrM.33.1550<br>LBRM2903_330021200.1<br>LPAL13_000053800.1<br>LPAL13_010008000.1<br>LPAL13_330019400.1                                                                                                                                                                                                   |

|              |                                                       |   |                                                                                                          |
|--------------|-------------------------------------------------------|---|----------------------------------------------------------------------------------------------------------|
| VIANNIA_0770 | hypothetical protein                                  | 5 | LBRM2903_310035700.1<br>LBRM2903_310035800.1<br>LPAL13_310028900.1<br>LPAL13_310029000.1<br>LpmP.31.2180 |
| VIANNIA_1594 | unspecified product                                   | 5 | LbrM.23.0770<br>LBRM2903_230016400.1<br>LBRM2903_230016500.1<br>LPAL13_110009000.1<br>LPAL13_110009100.1 |
| VIANNIA_1595 | beta tubulin-like protein                             | 5 | LBRM2903_010014400.1<br>LBRM2903_010014500.1<br>LPAL13_000027000.1<br>LPAL13_010012500.1<br>LpmP.01.0810 |
| VIANNIA_1596 | cysteine peptidase, Clan CA, family C2, putative      | 4 | LbrM.20.5390<br>LBRM2903_200068700.1<br>LBRM2903_200068800.1<br>LPAL13_200060400.1                       |
| VIANNIA_1597 | amastin-like surface protein-like protein             | 4 | LbrM.24.1280<br>LBRM2903_240018900.1<br>LPAL13_240018700.1<br>LPAL13_330042500.1                         |
| VIANNIA_1598 | alpha tubulin                                         | 4 | LbrM.29.2700<br>LBRM2903_130007300.1<br>LBRM2903_130007400.1<br>LBRM2903_290035900.1                     |
| VIANNIA_7163 | hypothetical protein                                  | 4 | LbrM.06.1180<br>LBRM2903_060019200.1<br>LPAL13_060018200.1<br>LpmP.06.1180                               |
| VIANNIA_7164 | amastin-like protein                                  | 4 | LbrM.08.0680<br>LBRM2903_290021100.1<br>LPAL13_080010300.1<br>LpmP.29.1390                               |
| VIANNIA_7165 | hypothetical protein                                  | 4 | LbrM.11.1130<br>LBRM2903_110019600.1<br>LPAL13_110017700.1<br>LpmP.11.1320                               |
| VIANNIA_7166 | hypothetical protein                                  | 4 | LBRM2903_130014200.1<br>LBRM2903_130014300.1<br>LPAL13_100012100.1<br>LPAL13_130013500.1                 |
| VIANNIA_7167 | Carboxypeptidase Taq (M32) metallopeptidase, putative | 4 | LBRM2903_140006700.1<br>LBRM2903_140006800.1<br>LPAL13_140006600.1<br>LPAL13_140006700.1                 |
| VIANNIA_7168 | hypothetical protein, conserved                       | 4 | LbrM.16.1060<br>LBRM2903_160017700.1<br>LPAL13_160014500.1<br>LpmP.16.0990                               |
| VIANNIA_7169 | hypothetical protein                                  | 4 | LbrM.20.3580<br>LBRM2903_200050000.1<br>LPAL13_200043300.1<br>LpmP.20.3720                               |
| VIANNIA_7170 | hypothetical protein                                  | 4 | LbrM.20.5420<br>LBRM2903_200069100.1<br>LPAL13_200060800.1<br>LpmP.20.5390                               |
| VIANNIA_7171 | hypothetical protein                                  | 4 | LbrM.22.1470<br>LBRM2903_220021500.1<br>LPAL13_220018200.1<br>LpmP.22.1460                               |

|              |                                                   |   |                                                                                          |
|--------------|---------------------------------------------------|---|------------------------------------------------------------------------------------------|
| VIANNIA_7172 | hypothetical protein                              | 4 | LbrM.26.0010<br>LBRM2903_260005000.1<br>LPAL13_260005000.1<br>LpmP.26.0010               |
| VIANNIA_7173 | glutathione peroxidase-like protein, putative     | 4 | LbrM.26.0810<br>LBRM2903_260012900.1<br>LPAL13_260012600.1<br>LpmP.26.0780               |
| VIANNIA_7174 | histone H1-like protein                           | 4 | LbrM.27.1740<br>LBRM2903_270023100.1<br>LPAL13_270023200.1<br>LpmP.27.1600               |
| VIANNIA_7175 | hypothetical protein                              | 4 | LBRM2903_290019800.1<br>LBRM2903_290019900.1<br>LPAL13_290017200.1<br>LPAL13_290017300.1 |
| VIANNIA_7176 | hypothetical protein                              | 4 | LbrM.30.0010<br>LBRM2903_300005100.1<br>LPAL13_300005100.1<br>LpmP.30.0010               |
| VIANNIA_7177 | multidrug resistance protein, copy 1-like protein | 4 | LbrM.31.1520<br>LBRM2903_310017900.1<br>LPAL13_310013600.1<br>LpmP.31.1210               |
| VIANNIA_7178 | beta-galactofuranosyltransferase-like protein     | 4 | LbrM.33.0310<br>LBRM2903_330008000.1<br>LPAL13_330008000.1<br>LpmP.33.0350               |
| VIANNIA_7179 | hypothetical protein, conserved                   | 4 | LbrM.33.1340<br>LBRM2903_330018400.1<br>LPAL13_330017000.1<br>LpmP.33.1190               |
| VIANNIA_7180 | hypothetical protein                              | 4 | LbrM.33.3180<br>LBRM2903_330039700.1<br>LPAL13_330038000.1<br>LpmP.33.3020               |
| VIANNIA_7181 | hypothetical protein                              | 4 | LbrM.34.2010<br>LBRM2903_340027000.1<br>LPAL13_340025400.1<br>LpmP.34.1930               |
| VIANNIA_7182 | hypothetical protein                              | 4 | LBRM2903_350077300.1<br>LBRM2903_350077400.1<br>LPAL13_350072700.1<br>LPAL13_350072800.1 |
| VIANNIA_7183 | hypothetical protein, conserved                   | 3 | LBRM2903_040011800.1<br>LBRM2903_040012100.1<br>LPAL13_040012200.1                       |
| VIANNIA_7184 | hypothetical protein                              | 3 | LBRM2903_080014100.1<br>LBRM2903_080014200.1<br>LPAL13_000034300.1                       |
| VIANNIA_7185 | GP63, leishmanolysin (LbrM.10.1540.1)             | 3 | LbrM.10.1540<br>LBRM2903_000009300.1<br>LBRM2903_000009400.1                             |
| VIANNIA_7186 | hypothetical protein                              | 3 | LbrM.23.0550<br>LBRM2903_230011600.1<br>LPAL13_230011200.1                               |
| VIANNIA_7187 | heat-shock protein hsp70, putative                | 3 | LbrM.28.2970<br>LBRM2903_280037200.1<br>LPAL13_110015300.1                               |
| VIANNIA_7188 | hypothetical protein, conserved                   | 3 | LbrM.31.2340<br>LBRM2903_310032500.1<br>LPAL13_310026000.1                               |

|              |                                 |   |                                                                  |
|--------------|---------------------------------|---|------------------------------------------------------------------|
| VIANNIA_7189 | d-xylulose reductase, putative  | 3 | LbrM.33.0510<br>LBRM2903_330010300.1<br>LBRM2903_330010400.1     |
| VIANNIA_7190 | hypothetical protein, conserved | 3 | LbrM.34.3390<br>LBRM2903_340042700.1<br>LBRM2903_350032900.1     |
| VIANNIA_7191 | hypothetical protein            | 3 | LBRM2903_350079000.1<br>LPAL13_350074300.1<br>LpmP.11.0520       |
| VIANNIA_7192 | hypothetical protein            | 3 | LBRM2903_200075300.1<br>LPAL13_200066500.1<br>LpmP.12.1040       |
| VIANNIA_7193 | hypothetical protein            | 3 | LBRM2903_130019300.1<br>LPAL13_130018500.1<br>LpmP.13.1380       |
| VIANNIA_7194 | hypothetical protein            | 3 | LBRM2903_140010900.1<br>LPAL13_140010700.1<br>LpmP.14.0550       |
| VIANNIA_7195 | hypothetical protein            | 3 | LBRM2903_200012200.1<br>LPAL13_200010500.1<br>LpmP.20.0630       |
| VIANNIA_7196 | hypothetical protein            | 3 | LBRM2903_320034800.1<br>LPAL13_320032600.1<br>LpmP.32.2640       |
| VIANNIA_7197 | hypothetical protein            | 3 | LBRM2903_330043500.1<br>LPAL13_330041700.1<br>LpmP.33.3330       |
| VIANNIA_7326 | hypothetical protein, conserved | 3 | LbrM.04.0590<br>LBRM2903_040011000.1<br>LPAL13_040011300.1       |
| VIANNIA_7327 | ubiquitin-fusion protein        | 3 | LbrM.09.0640<br>LBRM2903_090015000.1<br>LPAL13_000026200.1       |
| VIANNIA_7328 | aminopeptidase, putative        | 3 | LbrM.11.0400<br>LBRM2903_110008800.1<br>LpmP.11.0640             |
| VIANNIA_7329 | hypothetical protein, conserved | 3 | LbrM.21.2130<br>LBRM2903_080018200.1<br>LpmP.08.1070             |
| VIANNIA_7330 | hypothetical protein            | 3 | LbrM.22.1380<br>LBRM2903_220020400.1<br>LpmP.22.1370             |
| VIANNIA_7331 | hypothetical protein            | 3 | LBRM2903_240022000.1<br>LPAL13_240019900.1<br>LPAL13_240020000.1 |
| VIANNIA_7332 | hypothetical protein            | 3 | LbrM.25.0570<br>LBRM2903_250014800.1<br>LPAL13_250013400.1       |
| VIANNIA_7333 | ABC transporter, putative       | 3 | LbrM.27.1060<br>LBRM2903_270016500.1<br>LPAL13_270016800.1       |
| VIANNIA_7334 | hypothetical protein            | 3 | LbrM.31.0200<br>LBRM2903_310006200.1<br>LpmP.29.1810             |
| VIANNIA_7335 | hypothetical protein, conserved | 3 | LbrM.31.1000<br>LBRM2903_310017300.1<br>LpmP.31.0810             |
| VIANNIA_7336 | hypothetical protein            | 3 | LbrM.34.1660<br>LBRM2903_340022900.1<br>LpmP.34.1600             |

|              |                                                           |   |                                                                  |
|--------------|-----------------------------------------------------------|---|------------------------------------------------------------------|
| VIANNIA_7337 | hypothetical protein, conserved                           | 3 | LBRM2903_340045900.1<br>LPAL13_340042700.1<br>LPAL13_340042800.1 |
| VIANNIA_7338 | BT1 family, putative                                      | 3 | LBRM2903_340061500.1<br>LPAL13_320009700.1<br>LPAL13_340057800.1 |
| VIANNIA_7339 | phosphoglycan beta 1,3 galactosyltransferase-like protein | 2 | LbrM.02.0790<br>LBRM2903_020007500.1                             |
| VIANNIA_7340 | BT1 family, putative                                      | 2 | LBRM2903_040005200.1<br>LBRM2903_040005300.1                     |
| VIANNIA_7341 | ATP synthase F1, alpha subunit, putative (fragment)       | 2 | LbrM.05.0510<br>LBRM2903_050010300.1                             |
| VIANNIA_7342 | hypothetical protein, conserved                           | 2 | LBRM2903_080013900.1<br>LPAL13_080010400.1                       |
| VIANNIA_7343 | hypothetical protein, conserved                           | 2 | LBRM2903_110009300.1<br>LBRM2903_110009400.1                     |
| VIANNIA_7344 | protein associated with differentiation 8, putative       | 2 | LbrM.13.1550<br>LBRM2903_130021700.1                             |
| VIANNIA_7345 | P-type H+ATPase, putative                                 | 2 | LbrM.18.1730<br>LBRM2903_000009600.1                             |
| VIANNIA_7346 | hypothetical protein, unknown function                    | 2 | LbrM.19.1900<br>LBRM2903_190026200.1                             |
| VIANNIA_7347 | hypothetical protein, unknown function                    | 2 | LbrM.19.1920<br>LPAL13_040012000.1                               |
| VIANNIA_7348 | amastin-like surface protein, putative                    | 2 | LbrM.20.0950<br>LBRM2903_200016500.1                             |
| VIANNIA_7349 | pumilio protein 9, putative                               | 2 | LbrM.20.5610<br>LPAL13_200062600.1                               |
| VIANNIA_7350 | orthologous HASP                                          | 2 | LbrM.23.1110<br>LPAL13_230018700.1                               |
| VIANNIA_7351 | hypothetical protein                                      | 2 | LbrM.29.2910<br>LBRM2903_340005400.1                             |
| VIANNIA_7352 | histone H4                                                | 2 | LbrM.30.0450<br>LBRM2903_300009500.1                             |
| VIANNIA_7353 | sodium stibogluconate resistance protein, putative        | 2 | LbrM.31.1140<br>LBRM2903_310019100.1                             |
| VIANNIA_7354 | adenosine deaminase-like protein                          | 2 | LbrM.33.0250<br>LBRM2903_310012500.1                             |
| VIANNIA_7355 | hypothetical protein, conserved                           | 2 | LbrM.35.7400<br>LPAL13_000009700.1                               |
| VIANNIA_7356 | E2 ubiquitin ligase-like protein                          | 2 | LPAL13_090014900.1<br>LpmP.09.1010                               |
| VIANNIA_7357 | hypothetical protein                                      | 2 | LPAL13_200015200.1<br>LpmP.20.1070                               |
| VIANNIA_7358 | hypothetical protein                                      | 2 | LPAL13_010010400.1<br>LPAL13_240012600.1                         |
| VIANNIA_7359 | PIN domain containing protein, putative                   | 2 | LBRM2903_310032800.1<br>LPAL13_310026200.1                       |
| VIANNIA_7360 | L-ribulokinase, putative                                  | 2 | LBRM2903_350006400.1<br>LPAL13_350005200.1                       |
| VIANNIA_7456 | hypothetical protein                                      | 2 | LbrM.11.1100<br>LpmP.11.1290                                     |
| VIANNIA_7457 | surface antigen protein, putative                         | 2 | LbrM.12.0760<br>LpmP.12.0760                                     |
| VIANNIA_7458 | hypothetical protein, conserved                           | 2 | LBRM2903_140007800.1<br>LPAL13_140007700.1                       |
| VIANNIA_7459 | hypothetical protein                                      | 2 | LBRM2903_210024400.1<br>LPAL13_210022700.1                       |
| VIANNIA_7460 | oxidoreductase-like protein                               | 2 | LBRM2903_230012500.1<br>LPAL13_230012100.1                       |
| VIANNIA_7461 | adenine phosphoribosyltransferase                         | 2 | LbrM.26.0120<br>LBRM2903_260006200.1                             |



|              |                                                 |   |                                            |
|--------------|-------------------------------------------------|---|--------------------------------------------|
| VIANNIA_7462 | hypothetical protein, conserved                 | 2 | LbrM.28.1800<br>LpmP.28.1740               |
| VIANNIA_7463 | FAD binding domain containing protein, putative | 2 | LBRM2903_290008500.1<br>LPAL13_290007900.1 |
| VIANNIA_7464 | S1/P1 Nuclease, putative                        | 2 | LBRM2903_310035200.1<br>LPAL13_310028200.1 |
| VIANNIA_7465 | hypothetical protein, conserved                 | 2 | LBRM2903_310041300.1<br>LPAL13_310034400.1 |
| VIANNIA_7466 | hypothetical protein                            | 2 | LbrM.35.6670<br>LpmP.35.6510               |

**Table S2. Potentially promiscuous peptides predicted to act as MHC-I and MHC-II epitopes derived from proteins within *Viannia*-specific ortholog groups.**

| Peptide <sup>1</sup>                                               | MHCII Coverage | MHCII Alleles                                                                         | Overlapping 9-mers                               | MHCI Coverage | MHCI Alleles                                                              | Proteins                                                                   |
|--------------------------------------------------------------------|----------------|---------------------------------------------------------------------------------------|--------------------------------------------------|---------------|---------------------------------------------------------------------------|----------------------------------------------------------------------------|
| <b>VIANNIA_0765 (phosphoglycan beta-1,3-galactosyltransferase)</b> |                |                                                                                       |                                                  |               |                                                                           |                                                                            |
| AMHAINASAAMLQRA<br>DAMHAINASAAMLQR                                 | 4              | DQA1*03:01/DQB1*03:02<br>DQA1*04:01/DQB1*04:02<br>DQA1*05:01/DQB1*03:01<br>DRB1*08:02 | MHAINASAA<br>HAINASAAM<br>AINASAAML<br>NASAAMLQR | 7             | A*68:01<br>B*15:01<br>B*39:01<br>C*03:03<br>C*04:01<br>C*07:02<br>C*15:02 | LBRM2903_020007400.1<br>LPAL13_020007000.1<br>LbrM.02.0240<br>LpmP.02.0140 |
| ATYATAIAATRDLP<br>DTATYATAIAATRD<br>TATYATAIAATRDV                 | 4              | DQA1*03:01/DQB1*03:02<br>DQA1*04:01/DQB1*04:02<br>DQA1*05:01/DQB1*03:01<br>DRB1*08:02 | ATYATAIAA<br>YATAIAATR<br>TAIAATRDL              | 4             | A*31:01<br>A*68:01<br>C*03:03<br>C*15:02                                  |                                                                            |
| <b>VIANNIA_0767 (hypothetical protein)</b>                         |                |                                                                                       |                                                  |               |                                                                           |                                                                            |
| NWMSSSIELEAVDVR<br>WMSSSIELEAVDVRK                                 | 3              | DPA1*03:01/DPB1*04:02<br>DQA1*03:01/DQB1*03:02<br>DQA1*04:01/DQB1*04:02               | NWMSSSIEL<br>MSSSIELEA<br>SSSIELEAV<br>ELEAVDVRK | 6             | A*24:02<br>A*68:01<br>B*39:01<br>C*04:01<br>C*07:02<br>C*15:02            | LBRM2903_310033200.1<br>LPAL13_310026500.1<br>LbrM.31.2370<br>LpmP.31.1960 |
| <b>VIANNIA_7165 (hypothetical protein)</b>                         |                |                                                                                       |                                                  |               |                                                                           |                                                                            |
| EGIGWYGAISSVVDVL<br>GIGWYGAISSVVDVLI<br>IGWYGAISSVVDVLIG           | 4              | DQA1*03:01/DQB1*03:02<br>DQA1*04:01/DQB1*04:02<br>DQA1*05:01/DQB1*03:01<br>DRB1*08:02 | IGWYGAISSV<br>YGAISSVVDV<br>GAISSVVDVL           | 2             | C*03:03<br>C*15:02                                                        | LBRM2903_110019600.1<br>LPAL13_110017700.1<br>LbrM.11.1130<br>LpmP.11.1320 |
| <b>VIANNIA_7170 (hypothetical protein)</b>                         |                |                                                                                       |                                                  |               |                                                                           |                                                                            |
| MGDSAVLLEEHTAVL                                                    | 2              | DQA1*03:01/DQB1*03:02<br>DQA1*04:01/DQB1*04:02                                        | VLLEEHTAV<br>LLEEHTAVL                           | 6             | A*02:01<br>B*39:01<br>C*03:03<br>C*04:01<br>C*07:02<br>C*15:02            | LBRM2903_200069100.1<br>LPAL13_200060800.1<br>LbrM.20.5420<br>LpmP.20.5390 |

| <b>VIANNIA_7171 (hypothetical protein)</b>                                                                                                                              |   |                                                                                                                |                                                                            |   |                                                                                                 |                                                                            |
|-------------------------------------------------------------------------------------------------------------------------------------------------------------------------|---|----------------------------------------------------------------------------------------------------------------|----------------------------------------------------------------------------|---|-------------------------------------------------------------------------------------------------|----------------------------------------------------------------------------|
| ATMSEAALVFESTMA<br>MSEAALVFESTMAEG<br>FRTATMSEAALVFES<br>RTATMSEAALVFEST<br>SEAALVFESTMAEGM<br>TMSEAALVFESTMAE                                                          | 3 | DQA1*03:01/DQB1*03:02<br>DQA1*04:01/DQB1*04:02<br>DQA1*05:01/DQB1*03:01                                        | ATMSEAALV<br>TMSEAALVF<br>SEAALVFES<br>AALVFESTM<br>FRTATMSEA<br>TATMSEAAL | 9 | A*02:01<br>A*24:02<br>B*15:01<br>B*39:01<br>B*40:02<br>C*03:03<br>C*04:01<br>C*07:02<br>C*15:02 | LBRM2903_220021500.1<br>LPAL13_220018200.1<br>LbrM.22.1470<br>LpmP.22.1460 |
| <b>VIANNIA_7173 (glutathione peroxidase-like protein putative)</b>                                                                                                      |   |                                                                                                                |                                                                            |   |                                                                                                 |                                                                            |
| APGASIAEIDVRIEE<br>ARFAPGASIAEIDVR<br>ASIAEIDVRIEELLH<br>FAPGASIAEIDVRIE<br>GASIAEIDVRIEELL<br>PGASIAEIDVRIEEL<br>PYARFAPGASIAEID<br>RFAPGASIAEIDVRI<br>YARFAPGASIAEIDV | 3 | DQA1*03:01/DQB1*03:02<br>DQA1*04:01/DQB1*04:02<br>DQA1*05:01/DQB1*03:01                                        | SIAEIDVRI<br>ARFAPGASI<br>RFAPGASIA                                        | 5 | A*02:01<br>B*39:01<br>C*04:01<br>C*07:02<br>C*15:02                                             | LBRM2903_260012900.1<br>LPAL13_260012600.1<br>LbrM.26.0810<br>LpmP.26.0780 |
| MLDATVATVEDEDLT<br>SMLDATVATVEDEDL<br>SVSMLDATVATVEDE<br>VSMLDATVATVEDED<br>VSVSMLDATVATVED                                                                             | 3 | DQA1*03:01/DQB1*03:02<br>DQA1*04:01/DQB1*04:02<br>DQA1*05:01/DQB1*03:01                                        | MLDATVATV<br>SMLDATVAT<br>VSMLDATVA<br>SVSMLDATV                           | 5 | A*02:01<br>B*39:01<br>C*03:03<br>C*04:01<br>C*15:02                                             |                                                                            |
| <b>VIANNIA_7176 (hypothetical protein)</b>                                                                                                                              |   |                                                                                                                |                                                                            |   |                                                                                                 |                                                                            |
| DLAAISVAQERILLQ<br>LAAISVAQERILLQE<br>VDLAAISVAQERILL<br>PVDLAAISVAQERIL                                                                                                | 5 | DPA1*03:01/DPB1*04:02<br>DQA1*03:01/DQB1*03:02<br>DQA1*04:01/DQB1*04:02<br>DQA1*05:01/DQB1*03:01<br>DRB1*08:02 | AAISVAQER<br>ISVAQERIL<br>SVAQERILL                                        | 4 | A*31:01<br>A*68:01<br>C*03:03<br>C*15:02                                                        | LBRM2903_300005100.1<br>LPAL13_300005100.1<br>LbrM.30.0010<br>LpmP.30.0010 |
| GLLWSYASVVFSSSL<br>LLWSYASVVFSSSLV<br>LWSYASVVFSSSLVF<br>RGLLWSYASVVFSS                                                                                                 | 5 | DPA1*03:01/DPB1*04:02<br>DQA1*03:01/DQB1*03:02<br>DQA1*04:01/DQB1*04:02<br>DQA1*05:01/DQB1*03:01<br>DRB1*08:02 | GLLWSYASV<br>LLWSYASVV<br>LWSYASVVF<br>ASVVFSSSL<br>SVVFSSSLV<br>VVFSSSLVF | 7 | A*02:01<br>A*24:02<br>B*15:01<br>C*03:03<br>C*04:01<br>C*07:02<br>C*15:02                       |                                                                            |

| <b>VIANNIA_7180 (hypothetical protein)</b> |   |                                                                         |                                     |   |                               |                                                                            |
|--------------------------------------------|---|-------------------------------------------------------------------------|-------------------------------------|---|-------------------------------|----------------------------------------------------------------------------|
| EDQVVAFPQEQPTCL                            | 2 | DQA1*03:01/DQB1*03:02<br>DQA1*04:01/DQB1*04:02                          | FPQEQPTCL                           | 3 | B*39:01<br>C*03:03<br>C*04:01 | LBRM2903_330039700.1<br>LPAL13_330038000.1<br>LbrM.33.3180<br>LpmP.33.3020 |
| <b>VIANNIA_7181 (hypothetical protein)</b> |   |                                                                         |                                     |   |                               |                                                                            |
| GVEEIALWLEVYQAV<br>RGVEEIALWLEVYQA         | 3 | DPA1*03:01/DPB1*04:02<br>DQA1*03:01/DQB1*03:02<br>DQA1*04:01/DQB1*04:02 | EEIALWLEV<br>ALWLEVYQA<br>LWLEVYQAV | 3 | A*02:01<br>A*24:02<br>B*40:02 | LbrM.34.2010<br>LBRM2903_340027000.1<br>LPAL13_340025400.1<br>LpmP.34.1930 |
| LRGVEEIALWLEVYQ<br>SLRGVEEIALWLEVY         | 3 | DPA1*03:01/DPB1*04:02<br>DQA1*03:01/DQB1*03:02<br>DQA1*04:01/DQB1*04:02 | LRGVEEIAL<br>EEIALWLEV              | 2 | B*39:01<br>B*40:02            |                                                                            |

<sup>1</sup> Region of the sequence that is covered by overlapping 9-mers is colored in blue.

**Table S3. Peptides from previously published studies applying reverse vaccinology strategy to pathogenic *Leishmania* species, used in the validation of our prediction methodology.**

| Predicted peptides                               | Viannia genomes | Viannia Topes | IEDB | IEDB matches                   | IEDB reported assays <sup>1</sup>          |
|--------------------------------------------------|-----------------|---------------|------|--------------------------------|--------------------------------------------|
| <b>Singh et al., 2015 (<i>L. major</i>)</b>      |                 |               |      |                                |                                            |
| SLWSSLAGV                                        | N               | N             | N    |                                |                                            |
| ALYTSIPVR                                        | N               | N             | N    |                                |                                            |
| GYPNINTYL                                        | N               | N             | N    |                                |                                            |
| YLLDGDQLI                                        | N               | N             | N    |                                |                                            |
| LYLLLPFLL                                        | N               | N             | N    |                                |                                            |
| GYIVVDKYF                                        | N               | N             | N    |                                |                                            |
| VLGVVVLGV                                        | N               | N             | N    |                                |                                            |
| TLFPIDVTV                                        | N               | N             | N    |                                |                                            |
| SFDDYTMVL                                        | N               | N             | N    |                                |                                            |
| VSAQTIDDY                                        | N               | N             | N    |                                |                                            |
| SPTPLLAAL                                        | N               | N             | N    |                                |                                            |
| LMAAMLVAV                                        | N               | N             | N    |                                |                                            |
| FLFSPTDTL                                        | N               | N             | N    |                                |                                            |
| HVARQLASY                                        | N               | N             | N    |                                |                                            |
| MLPDMTCSL                                        | Y               | Y             | N    |                                |                                            |
| LFLLVIYAF                                        | N               | N             | N    |                                |                                            |
| LFGAFLFAF                                        | N               | N             | N    |                                |                                            |
| AYFVPLEM                                         | Y               | Y             | N    |                                |                                            |
| KHLLMAAML                                        | N               | N             | N    |                                |                                            |
| IHPERTVAL                                        | Y               | Y             | N    |                                |                                            |
| LPRLFLAFL                                        | N               | N             | N    |                                |                                            |
| TPRIPLDSL                                        | N               | N             | N    |                                |                                            |
| L VHAGIAGK                                       | N               | N             | N    |                                |                                            |
| AHAPQNAAL                                        | N               | N             | N    |                                |                                            |
| APNYLTPL                                         | N               | N             | N    |                                |                                            |
| SVVDPMQNY                                        | N               | N             | N    |                                |                                            |
| AMKDPYTNY                                        | N               | N             | N    |                                |                                            |
| YLCDRTTAA                                        | N               | N             | N    |                                |                                            |
| LLPRLFLAF                                        | N               | N             | N    |                                |                                            |
| SQQETSPLY                                        | N               | N             | N    |                                |                                            |
| YQLTGPVVL                                        | N               | N             | N    |                                |                                            |
| VRAPFTIQL                                        | Y               | Y             | N    |                                |                                            |
| KRGAAVLL                                         | N               | N             | N    |                                |                                            |
| SIMSLQIRY                                        | Y               | Y             | N    |                                |                                            |
| SLWSSLAGV                                        | N               | N             | N    |                                |                                            |
| <b>Agallou et al., 2014 (<i>L. infantum</i>)</b> |                 |               |      |                                |                                            |
| FFAIVVTIL                                        | Y               | N             | N    |                                |                                            |
| HYDVSGKFA                                        | Y               | Y             | N    |                                |                                            |
| LYFGVVVTL                                        | N               | N             | Y    | LYFGGVVTLCFGLSLNHGVLVVGFNQAKP  | Agallou et al. 2014                        |
| AYVGKNGPV                                        | N               | N             | N    |                                |                                            |
| SALIAQTPL                                        | N               | N             | N    |                                |                                            |
| LYLNPYYA                                         | N               | N             | N    |                                |                                            |
| NYVVTATID                                        | N               | N             | N    |                                |                                            |
| FFFAIVVTI                                        | N               | N             | N    |                                |                                            |
| QWALKNHSL                                        | N               | N             | Y    | GNIEGQWALKNHSLVSLSEQVLVSCDNIDD | Agallou et al. 2017<br>Agallou et al. 2014 |
| RFNAFKQNM                                        | Y               | N             | N    |                                |                                            |
| GYIRLAMGS                                        | N               | N             | N    |                                |                                            |
| QVLVSCDNI                                        | N               | N             | Y    | GNIEGQWALKNHSLVSLSEQVLVSCDNIDD | Agallou et al. 2017<br>Agallou et al. 2014 |

|                   |   |   |   |                                |                                            |
|-------------------|---|---|---|--------------------------------|--------------------------------------------|
| QNMQTAYFL         | N | N | N |                                |                                            |
| GNIEGQWAL         | Y | Y | Y | GNIEGQWALKNHSLVSLSEQVLVSCDNIDD | Agallou et al. 2017<br>Agallou et al. 2014 |
| MCGSCWAFATTGNIE   | Y | N | N |                                |                                            |
| PHDEEEIAAYVGKNG   | Y | N | N |                                |                                            |
| KDYKEHVHDDSVRS    | N | N | N |                                |                                            |
| GKNGPVAVVDATTW    | S | N | N |                                |                                            |
| GVDDFIASAHYGRFK   | Y | N | N |                                |                                            |
| GSSWGEKGYIRLAMG   | Y | N | N |                                |                                            |
| RNPFFFAIVVTILFV   | S | N | N |                                |                                            |
| NPFFFAIVVTILFVV   | Y | N | N |                                |                                            |
| VTILFVVCYGSALIA   | S | N | N |                                |                                            |
| SLVSLSEQVLVSCDN   | Y | N | Y | GNIEGQWALKNHSLVSLSEQVLVSCDNIDD | Agallou et al. 2017<br>Agallou et al. 2014 |
| VSLSEQVLVSCDNID   | Y | N | Y | GNIEGQWALKNHSLVSLSEQVLVSCDNIDD | Agallou et al. 2017<br>Agallou et al. 2014 |
| VVTILFVVCYGSALI   | Y | N | N |                                |                                            |
| GPVAVAVDATTWQLY   | Y | N | N |                                |                                            |
| VTLCFGLSLNHGVLV   | Y | N | Y | LYFGGVVTLFCFGLSLNHGVLVVGFNQAKP | Agallou et al. 2014                        |
| KQNMQTAYFLNAHNP   | Y | N | N |                                |                                            |
| LYFGGVVTLFCFGLSL  | Y | N | Y | LYFGGVVTLFCFGLSLNHGVLVVGFNQAKP | Agallou et al. 2014                        |
| KPPYWIVKNSWGSSW   | Y | N | N |                                |                                            |
| NQCLLKNYVVTATID   | S | N | N |                                |                                            |
| SYPYTSAGGTRPPCH   | Y | N | N |                                |                                            |
| KNSWGSSWGEKGYIR   | Y | N | N |                                |                                            |
| KKAGAKKAV         | N | N | Y | AGAKKAGAKKAVRKVATPKK           | Agallou et al. 2014                        |
| SSDSAVAAL         | N | N | Y | MSSDSAVAALSAAMTSPQKS           | Agallou et al. 2014                        |
| MSSDSAVAALSAAMT   | N | N | Y | MSSDSAVAALSAAMTSPQKS           | Agallou et al. 2014                        |
| KTAAKAAAACKAAA    | N | N | N |                                |                                            |
| KAAAACKAAAACKAGAK | N | N | N |                                |                                            |
| KAAAACKAGAKKAGAK  | N | N | Y | AGAKKAGAKKAVRKVATPKK           | Agallou et al. 2014                        |
| KAGAKKAGAKKAVRK   | N | N | Y | AGAKKAGAKKAVRKVATPKK           | Agallou et al. 2014                        |
| SSDSAVAALSAAMTS   | N | N | Y | MSSDSAVAALSAAMTSPQKS           | Agallou et al. 2014                        |
| KVATPKKPAKKAACK   | N | N | Y | AGAKKAGAKKAVRKVATPKK           | Agallou et al. 2014                        |
| KKAAAACKAGAKKAGA  | N | N | Y | AGAKKAGAKKAVRKVATPKK           | Agallou et al. 2014                        |
| KKAGAKKAGAKKAVR   | N | N | Y | AGAKKAGAKKAVRKVATPKK           | Agallou et al. 2014                        |
| AAKKPAKKVAKKPAK   | N | N | N |                                |                                            |
| SPQKSPRSSPKKTAA   | S | N | N |                                |                                            |
| PRSSPKKTAACKAAA   | N | N | N |                                |                                            |
| KKTAACKAAAACKAAA  | N | N | N |                                |                                            |
| KKAAAACKAAAACKAGA | N | N | N |                                |                                            |
| AKKAGAKKAVRKVAT   | N | N | Y | AGAKKAGAKKAVRKVATPKK           | Agallou et al. 2014                        |
| KKAVRKVATPKKPAK   | N | N | Y | AGAKKAGAKKAVRKVATPKK           | Agallou et al. 2014                        |
| RKVATPKKPAKKAACK  | N | N | Y | AGAKKAGAKKAVRKVATPKK           | Agallou et al. 2014                        |
| TPKKPAKKAACKKAAK  | N | N | N |                                |                                            |
| PAKKAACKKAAKPAK   | N | N | N |                                |                                            |
| AAKKAACKPAKKVAK   | N | N | N |                                |                                            |
| PAKKVAKKPAKKAACK  | N | N | N |                                |                                            |
| VAKKPAKKAACKPAK   | N | N | N |                                |                                            |
| PAKKAACKPAKKPAK   | N | N | N |                                |                                            |
| AAKKPAKKAACKKAAK  | N | N | N |                                |                                            |
| PAKKPAKKAACKKAAK  | N | N | N |                                |                                            |
| PAKKAACKKAAKAAA   | N | N | N |                                |                                            |
| SAVAALSAAMTSPQK   | N | N | Y | MSSDSAVAALSAAMTSPQKS           | Agallou et al. 2014                        |
| AKKVAKKPAKKAACK   | N | N | N |                                |                                            |
| AKKAAKKAACKAAA    | N | N | N |                                |                                            |
| AAKKAACKKAAACKKA  | Y | Y | N |                                |                                            |
| AKKAAACKKAAACKAG  | N | N | N |                                |                                            |

|                  |   |   |   |                                                                                                                                                                                                                                                          |                                                                                      |
|------------------|---|---|---|----------------------------------------------------------------------------------------------------------------------------------------------------------------------------------------------------------------------------------------------------------|--------------------------------------------------------------------------------------|
| PKKTAACKAAAKKAA  | N | N | N |                                                                                                                                                                                                                                                          |                                                                                      |
| SPKKTAAKAAAKKA   | N | N | N |                                                                                                                                                                                                                                                          |                                                                                      |
| SDSAVAALSAAMTSP  | N | N | Y | MSSDSAVAALSAAMTSPQKS                                                                                                                                                                                                                                     | Agallou et al. 2014                                                                  |
| TAAKAAAKKAAAKK   | N | N | N |                                                                                                                                                                                                                                                          |                                                                                      |
| AKKAAAKKAGAKKAG  | N | N | Y | AGAKKAGAKKAVRKVATPKK                                                                                                                                                                                                                                     | Agallou et al. 2014                                                                  |
| AAKAAAKKAGAKKA   | N | N | Y | AGAKKAGAKKAVRKVATPKK                                                                                                                                                                                                                                     | Agallou et al. 2014                                                                  |
| DSAVAALSAAMTSPQ  | N | N | Y | MSSDSAVAALSAAMTSPQKS                                                                                                                                                                                                                                     | Agallou et al. 2014                                                                  |
| AGAKKAVRKVATPKK  | N | N | Y | AGAKKAGAKKAVRKVATPKK                                                                                                                                                                                                                                     | Agallou et al. 2014                                                                  |
| AAAKAAAKKAGAKK   | N | N | N |                                                                                                                                                                                                                                                          |                                                                                      |
| GAKKAVRKVATPKKP  | N | N | Y | AGAKKAGAKKAVRKVATPKK                                                                                                                                                                                                                                     | Agallou et al. 2014                                                                  |
| TYEEFSAKL        | N | N | Y | ATTYEEFSA, EEFSAKLDR, EFSAKLDR, MATTYEEFS, MATTYEEFSAKLDR, DEEFNRKM, QE, QNAK, FFA, DK, PDES, TTYEEFSAK, TYEEFSAKL, YEEFSAKLD, MATTYEEFAAKLDR, DEEFN, TYEEFSAKLDR, DEEFNRKM                                                                              | Agallou et al. 2014<br>Basu et al. 2007<br>Delgado et al. 2003<br>Jensen et al. 1998 |
| HYEKFERMI        | Y | Y | Y | AKFFADKPDESTLSPEMREHYEKFERMIKEHTEKFNKK, EHYEKFERM, EKFERMIKE, HYEKFERMI, KFERMIKEH, MREHYEKFE, REHYEKFER, YEKFERMIK, EHYDKFERMIKEHTEKFNKK                                                                                                                | Basu et al. 2007<br>Delgado et al. 2003<br>Jensen et al. 1998                        |
| HFKQFAEL         | N | N | N |                                                                                                                                                                                                                                                          |                                                                                      |
| HSEHFQKQF        | N | N | Y | EHFQKQFAE, EHSEHFQKQ, HEHSEHFQK, HFKQKFAEL, HSEHFQKQF, IKEHTEKFNKK, MHEHSEHFQKQFAELLEQQKAAQYPSK, MHEHSEHFQ, SEHFQKQFA, KFNKKMHEHSEHFQKQFAEL                                                                                                              | Basu et al. 2007<br>Delgado et al. 2003<br>Jensen et al. 1998                        |
| EFSAKLDR         | N | N | Y | AKLDR, DEE, EEFSAKLDR, EFSAKLDR, FSAKLDR, LD, MATTYEEFSAKLDR, DEEFNRKM, QE, QNAK, FFA, DK, PDES, SAKLDR, DE, TYEEFSAKL, YEEFSAKLD, TYEEFSAKLDR, DEEFNRKM, MATTYEEFAAKLDR, DEEFN                                                                          | Agallou et al. 2014<br>Basu et al. 2007<br>Delgado et al. 2003<br>Jensen et al. 1998 |
| TYEEFSAKLDR, DEE | Y | N | Y | AKLDR, DEE, ATTYEEFSA, DRLDEEFNR, EEFSAKLDR, EFSAKLDR, FSAKLDR, LD, DEEFN, LDRLDEEFN, MATTYEEFS, MATTYEEFSAKLDR, DEEFNRKM, QE, QNAK, FFA, DK, PDES, SAKLDR, DE, TTYEEFSAK, TYEEFSAKL, YEEFSAKLD (donovani); TYEEFSAKLDR, DEEFNRKM, MATTYEEFAAKLDR, DEEFN | Agallou et al. 2014<br>Basu et al. 2007<br>Delgado et al. 2003<br>Jensen et al. 1998 |
| QKFAELLEQQKAAQN  | S | N | Y | AELLEQQKA, ELLEQQKAA, EQKAAQYP, FAELLEQQK, FKQKFAELL, HFKQKFAEL, IKEHTEKFNKK, MHEHSEHFQKQFAELLEQQKAAQYPSK, KFAELLEQQ, KQKFAELLE, LEQQKAAQY, LLEQQKAAQ, QKFAELLEQ, QKAAQYPS, FKHKFAELLEQQKAAQYPSK, KFNKKMHEHSEHFQKQFAEL                                   | Basu et al. 2007<br>Delgado et al. 2003<br>Jensen et al. 1998                        |
| KEHYEKFERMIKEHT  | Y | Y | Y | AKFFADKPDESTLSPEMREHYEKFERMIKEHTEKFNKK, EHYEKFERM, EKFERMIKE, EMREHYEKF, ERMIKEHTE, FERMIKEHT, HYEKFERMI, IKEHTEKFN, KEHTEKFNK, KFERMIKEH, MIKEHTEKF, MREHYEKFE, PEMREHYEK, REHYEKFER, RMIKEHTEK, YEKFERMIK, EHYDKFERMIKEHTEKFNKK, FADKPDESTLSPEMKEHYDK  | Basu et al. 2007<br>Delgado et al. 2003<br>Jensen et al. 1998                        |
| KQKFAELLEQQKAAQ  | Y | N | Y | AELLEQQKA, EHFQKQFAE, ELLEQQKAA, EQKAAQYP, FAELLEQQK, FKQKFAELL, HFKQKFAEL, IKEHTEKFNKK, MHEHSEHFQKQFAELLEQQKAAQYPSK, KFAELLEQQ, KQKFAELLE, LEQQKAAQY, LLEQQKAAQ, QKFAELLEQ, QKAAQYPS, FKHKFAELLEQQKAAQYPSK, KFNKKMHEHSEHFQKQFAEL                        | Basu et al. 2007<br>Delgado et al. 2003<br>Jensen et al. 1998                        |
| HYHTQIDEL        | Y | Y | Y | VTEKDV, ELLHEIEAHYHTQIDEL, PVDF, AAY                                                                                                                                                                                                                     | Agallou et al. 2014                                                                  |
| RYGRKGVAI        | Y | Y | N |                                                                                                                                                                                                                                                          |                                                                                      |
| APQDQDSFL        | Y | N | Y | KIAPQDQDSFL, DDQPGV, RPIPS, FDDM, PLHQ                                                                                                                                                                                                                   | Agallou et al. 2014                                                                  |

|                  |   |   |   |                                                       |                                             |
|------------------|---|---|---|-------------------------------------------------------|---------------------------------------------|
| IPSFDDMPL        | Y | Y | Y | FLDDQPGVRPIPSFDDM,<br>KIAPQDQDSFLDDQPGVRPIPSFDDMPLHQ  | Agallou et al. 2014<br>Koutsoni et al. 2017 |
| LPKDIQVAL        | Y | Y | Y | PKDIQVALFSATMPEEVL,<br>DEMLSQGFADQIYEIFRFLPKDIQVALFSA | Agallou et al. 2014<br>Koutsoni et al. 2017 |
| LPTNKENYL        | Y | N | N |                                                       |                                             |
| LPVDFAAYL        | Y | Y | Y | VTEKDVELLHEIEAHYHTQIDELPVDFAAY                        | Agallou et al. 2014                         |
| SFLDDQPGV        | Y | N | Y | FLDDQPGVRPIPSFDDM;<br>KIAPQDQDSFLDDQPGVRPIPSFDDMPLHQ  | Agallou et al. 2014<br>Koutsoni et al. 2017 |
| RFLPKDIQV        | Y | Y | Y | PKDIQVALFSATMPEEVL<br>DEMLSQGFADQIYEIFRFLPKDIQVALFSA  | Agallou et al. 2014<br>Koutsoni et al. 2017 |
| LSPTRELAL        | Y | Y | Y | TRELALQTAEVISRIGE                                     | Koutsoni et al. 2017                        |
| GFADQIYEI        | Y | Y | Y | DEMLSQGFADQIYEIFRFLPKDIQVALFSA                        | Agallou et al. 2014                         |
| SRVLVTTDL        | Y | Y | N |                                                       |                                             |
| RPIPSFDDM        | Y | Y | Y | FLDDQPGVRPIPSFDDM,<br>KIAPQDQDSFLDDQPGVRPIPSFDDMPLHQ  | Agallou et al. 2014<br>Koutsoni et al. 2017 |
| NSSKFCETF        | Y | N | N |                                                       |                                             |
| VSIAQSVIF        | Y | Y | N |                                                       |                                             |
| KFMRDPVRI        | Y | Y | N |                                                       |                                             |
| IFRFLPKDI        | Y | N | Y | DEMLSQGFADQIYEIFRFLPKDIQVALFSA                        | Agallou et al. 2014                         |
| IFANTRRKV        | Y | Y | N |                                                       |                                             |
| TFRSGSSRV        | Y | Y | N |                                                       |                                             |
| RGALRTESL        | Y | Y | N |                                                       |                                             |
| LSPTRELALQTAEVI  | Y | Y | Y | TRELALQTAEVISRIGE                                     | Koutsoni et al. 2017                        |
| VLVTTDLVARGICVH  | Y | N | N |                                                       |                                             |
| LPKDIQVALFSATMP  | Y | N | Y | PKDIQVALFSATMPEEVL,<br>DEMLSQGFADQIYEIFRFLPKDIQVALFSA | Agallou et al. 2014<br>Koutsoni et al. 2017 |
| HTQIDELPVDFAAYL  | Y | Y | Y | VTEKDVELLHEIEAHYHTQIDELPVDFAAY                        | Agallou et al. 2014                         |
| QDDLRLKQAGVIVAV  | Y | N | N |                                                       |                                             |
| ALRTESLRVLVLDEA  | Y | Y | N |                                                       |                                             |
| TESLRVLVLDEADEM  | Y | Y | N |                                                       |                                             |
| RGGDIIAQASGTGK   | Y | Y | Y | IQQRRAIPFTRGGDII                                      | Koutsoni et al. 2017                        |
| DLRKLQAGVIVAVGT  | Y | N | N |                                                       |                                             |
| RKLQAGVIVAVGTPG  | Y | N | N |                                                       |                                             |
| MDLYETVSIAQSVIF  | Y | Y | N |                                                       |                                             |
| FMRDPVRILVKRESL  | Y | Y | N |                                                       |                                             |
| DLVARGIDVHHVNIV  | Y | N | N |                                                       |                                             |
| RTESLRVLVLDEADE  | Y | Y | N |                                                       |                                             |
| ETVSIAQSVIFANTR  | Y | N | N |                                                       |                                             |
| TVSSMHAEMPKSDRE  | Y | N | N |                                                       |                                             |
| RSGSSRVLVTTDLVA  | Y | N | N |                                                       |                                             |
| AQSVIFANTRRKVDW  | Y | Y | N |                                                       |                                             |
| LDDQPGVRPIPSFDD  | Y | N | Y | FLDDQPGVRPIPSFDDM,<br>KIAPQDQDSFLDDQPGVRPIPSFDDMPLHQ  | Agallou et al. 2014<br>Koutsoni et al. 2017 |
| QSGTGKTGAFSIGLL  | Y | Y | N |                                                       |                                             |
| ALQTAEVISRIGEFL  | Y | Y | Y | TRELALQTAEVISRIGE                                     | Koutsoni et al. 2017                        |
| VLVLDEADEMLSQGF  | Y | Y | Y | DEMLSQGFADQIYEIFRFLPKDIQVALFSA                        | Agallou et al. 2014                         |
| LDTLMDLYETVSIAQ  | Y | Y | N |                                                       |                                             |
| VELLHEIEAHYHTQI  | Y | N | Y | VTEKDVELLHEIEAHYHTQIDELPVDFAAY                        | Agallou et al. 2014                         |
| TGAFSIGLLQRLDFR  | Y | Y | N |                                                       |                                             |
| SIGLLQRLDFRHNL   | Y | N | N |                                                       |                                             |
| VSDVIKRGALRTESL  | Y | Y | N |                                                       |                                             |
| PTRELALQTAEVISR  | Y | Y | Y | TRELALQTAEVISRIGE                                     | Koutsoni et al. 2017                        |
| TRELALQTAEVISRI  | Y | Y | Y | TRELALQTAEVISRIGE                                     | Koutsoni et al. 2017                        |
| SPTRELALQTAEVIS  | Y | Y | Y | TRELALQTAEVISRIGE                                     | Koutsoni et al. 2017                        |
| DDLRLKQAGVIVAVG  | Y | N | N |                                                       |                                             |
| VLSPTRELALQTAEV  | Y | Y | Y | TRELALQTAEVISRIGE                                     | Koutsoni et al. 2017                        |
| LVLSPTRRELALQTAE | Y | y | Y | TRELALQTAEVISRIGE                                     | Koutsoni et al. 2017                        |
| LRKLQAGVIVAVGTP  | Y | N | N |                                                       |                                             |
| PSSIQQRAIAPFTRG  | Y | Y | Y | IQQRRAIPFTRGGDII, KPSSIQQRAIAPFTRGG                   | Koutsoni et al. 2017                        |



|                                       |   |   |   |                                     |                      |
|---------------------------------------|---|---|---|-------------------------------------|----------------------|
| KPSSIQQRRAIPFTR                       | Y | Y | Y | IQQRRAIPFTRGGDII, KPSSIQQRRAIPFTRGG | Koutsoni et al. 2017 |
| SSIQQRRAIPFTRGG                       | Y | Y | Y | IQQRRAIPFTRGGDII, KPSSIQQRRAIPFTRGG | Koutsoni et al. 2017 |
| GLVLSPTRELALQTA                       | Y | N | Y | TRELALQTAEVISRIGE                   | Koutsoni et al. 2017 |
| SNHTVSSMHAEMPKS                       | Y | N | N |                                     |                      |
| <b>Naouar et al., 2014 (L. major)</b> |   |   |   |                                     |                      |
| ALQEETHVL                             | N | N | Y | ALQEETHVL                           | Naouar et al. 2014   |
| YMAQKAEV                              | Y | Y | Y | YMAQKAEV                            | Naouar et al. 2014   |
| KLVSSAAV                              | N | N | Y | KLVSSAAV                            | Naouar et al. 2014   |
| VLGSHVQTL                             | N | N | Y | VLGSHVQTL                           | Naouar et al. 2014   |
| LLRQETARL                             | N | N | Y | LLRQETARL                           | Naouar et al. 2014   |
| HLMGQLNEL                             | Y | Y | Y | HLMGQLNEL                           | Naouar et al. 2014   |
| RLRDDLERL                             | N | N | Y | RLRDDLERL                           | Naouar et al. 2014   |
| YLLDVSTLL                             | Y | Y | Y | YLLDVSTLL                           | Naouar et al. 2014   |
| NLIDFNFKL                             | Y | Y | Y | NLIDFNFKL                           | Naouar et al. 2014   |
| LLKDSFAFL                             | Y | Y | Y | LLKDSFAFL                           | Naouar et al. 2014   |
| CLLDSFKEL                             | Y | Y | Y | CLLDSFKEL                           | Naouar et al. 2014   |
| VLEENRTTL                             | Y | Y | Y | VLEENRTTL                           | Naouar et al. 2014   |
| VLCALLFCV                             | N | N | Y | VLCALLFCV                           | Naouar et al. 2014   |
| KLHPVYDKV                             | N | N | Y | KLHPVYDKV                           | Naouar et al. 2014   |
| ALKGSVAV                              | N | N | N |                                     | Naouar et al. 2014   |
| EMASMITKV                             | N | N | Y | EMASMITKV                           | Naouar et al. 2014   |
| DMLAGIATL                             | N | N | Y | DMLAGIATL                           | Naouar et al. 2014   |
| LLSAQIARL                             | Y | Y | Y | LLSAQIARL                           | Naouar et al. 2014   |
| LLFDELTAL                             | Y | Y | Y | LLFDELTAL                           | Naouar et al. 2014   |
| RLMQCVQQL                             | N | N | Y | RLMQCVQQL                           | Naouar et al. 2014   |
| SLVVVSASL                             | N | N | Y | SLVVVSASL                           | Naouar et al. 2014   |
| SLCRSLVVV                             | N | N | Y | SLCRSLVVV                           | Naouar et al. 2014   |
| HLVAPLASL                             | N | N | Y | HLVAPLASL                           | Naouar et al. 2014   |
| ALNDALWAV                             | Y | Y | Y | ALNDALWAV                           | Naouar et al. 2014   |
| RLLVDLAQL                             | Y | Y | Y | RLLVDLAQL                           | Naouar et al. 2014   |
| IVVDAIMSV                             | N | N | Y | IVVDAIMSV                           | Naouar et al. 2014   |
| VIAGTSNAV                             | N | N | Y | VIAGTSNAV                           | Naouar et al. 2014   |
| AMREALRYL                             | Y | Y | Y | AMREALRYL                           | Naouar et al. 2014   |
| GVFDDAISI                             | Y | Y | Y | GVFDDAISI                           | Naouar et al. 2014   |
| QVGAFLEGL                             | N | N | Y | QVGAFLEGL                           | Naouar et al. 2014   |
| GLDYSEELL                             | Y | N | Y | GLDYSEELL                           | Naouar et al. 2014   |
| RVAASVAAV                             | N | N | Y | RVAASVAAV                           | Naouar et al. 2014   |
| GTDDTVAAV                             | N | N | Y | GTDDTVAAV                           | Naouar et al. 2014   |
| TIPSFIVRV                             | Y | Y | Y | TIPSFIVRV                           | Naouar et al. 2014   |
| RLLEGS AIM                            | Y | Y | Y | RLLEGS AIM                          | Naouar et al. 2014   |
| LIQQRHIAV                             | N | N | Y | LIQQRHIAV                           | Naouar et al. 2014   |
| AVAKQIVTI                             | Y | Y | Y | AVAKQIVTI                           | Naouar et al. 2014   |
| ILERRLQTI                             | N | N | Y | ILERRLQTI                           | Naouar et al. 2014   |
| NMMAVVGLL                             | N | N | Y | NMMAVVGLL                           | Naouar et al. 2014   |
| KLEDEVFAL                             | N | N | Y | KLEDEVFAL                           | Naouar et al. 2014   |
| ELGNLEEV                              | N | N | Y | ELGNLEEV                            | Naouar et al. 2014   |
| RMADEVQRL                             | N | N | Y | RMADEVQRL                           | Naouar et al. 2014   |
| RLAVSLHEL                             | N | N | Y | RLAVSLHEL                           | Naouar et al. 2014   |
| LLGPAYQSI                             | N | N | Y | LLGPAYQSI                           | Naouar et al. 2014   |
| VIAEEPLYV                             | N | N | Y | VIAEEPLYV                           | Naouar et al. 2014   |
| PLSAVISPV                             | Y | Y | Y | PLSAVISPV                           | Naouar et al. 2014   |
| LLPAPLVSV                             | N | N | Y | LLPAPLVSV                           | Naouar et al. 2014   |
| MLLWTAVAV                             | N | N | Y | MLLWTAVAV                           | Naouar et al. 2014   |
| YLRTFPAAL                             | Y | Y | Y | YLRTFPAAL                           | Naouar et al. 2014   |
| RLAGFLAGL                             | N | N | Y | RLAGFLAGL                           | Naouar et al. 2014   |
| CLALIAWRV                             | N | N | Y | CLALIAWRV                           | Naouar et al. 2014   |
| VVAGMLRWV                             | N | N | Y | VVAGMLRWV                           | Naouar et al. 2014   |

|            |   |   |   |            |                    |
|------------|---|---|---|------------|--------------------|
| PLSPATRRRL | N | N | Y | PLSPATRRRL | Naouar et al. 2014 |
| MVLNAMAWL  | N | N | Y | MVLNAMAWL  | Naouar et al. 2014 |
| KIMEAITVV  | N | N | Y | KIMEAITVV  | Naouar et al. 2014 |
| FLAYDKFLL  | Y | Y | Y | FLAYDKFLL  | Naouar et al. 2014 |
| HIFDRVAGV  | N | N | Y | HIFDRVAGV  | Naouar et al. 2014 |
| ALNQFTKVL  | Y | N | Y | ALNQFTKVL  | Naouar et al. 2014 |
| AIVKDMARL  | N | N | Y | AIVKDMARL  | Naouar et al. 2014 |
| GLQEVTRAI  | N | N | Y | GLQEVTRAI  | Naouar et al. 2014 |
| VIANNVDPV  | Y | Y | Y | VIANNVDPV  | Naouar et al. 2014 |
| TLKNLIRSV  | N | N | Y | TLKNLIRSV  | Naouar et al. 2014 |
| TLLDALGML  | N | N | Y | TLLDALGML  | Naouar et al. 2014 |
| ALLAFTLGV  | Y | Y | Y | ALLAFTLGV  | Naouar et al. 2014 |
| TLGVKQMVV  | N | N | Y | TLGVKQMVV  | Naouar et al. 2014 |
| KLVRELFV   | Y | Y | Y | KLVRELFV   | Naouar et al. 2014 |
| TMLELLTQL  | Y | Y | Y | TMLELLTQL  | Naouar et al. 2014 |
| ALRERRMKV  | N | N | Y | ALRERRMKV  | Naouar et al. 2014 |
| LLHDRQHSI  | Y | Y | Y | LLHDRQHSI  | Naouar et al. 2014 |
| GLEQQIQEI  | Y | N | Y | GLEQQIQEI  | Naouar et al. 2014 |
| MLQTNLAL   | N | N | Y | MLQTNLAL   | Naouar et al. 2014 |
| SLQFSAFLL  | N | N | Y | SLQFSAFLL  | Naouar et al. 2014 |
| FMEVFGMLV  | N | N | Y | FMEVFGMLV  | Naouar et al. 2014 |
| MLVQSCTSI  | N | N | Y | MLVQSCTSI  | Naouar et al. 2014 |
| VVSVLTHSV  | N | N | Y | VVSVLTHSV  | Naouar et al. 2014 |
| WIPPVSVL   | N | N | Y | WIPPVSVL   | Naouar et al. 2014 |
| KIYQIGRSV  | N | N | Y | KIYQIGRSV  | Naouar et al. 2014 |
| QLNKKIYQI  | Y | N | Y | QLNKKIYQI  | Naouar et al. 2014 |

**Dikhit et al., 2017 (L. donovan)**

|                 |   |   |   |                                                   |                    |
|-----------------|---|---|---|---------------------------------------------------|--------------------|
| QSKFRPISASSMPDE | N | N | N |                                                   |                    |
| IQSYRLLKDAVASPL | N | N | N |                                                   |                    |
| LQSFVVTCSAAALTL | N | N | N |                                                   |                    |
| QSFVVTCSAAALTLA | N | N | N |                                                   |                    |
| ALLQSFVVTCSAAAL | S | N | N |                                                   |                    |
| ILDVIFMTSRLVAKM | Y | N | N |                                                   |                    |
| LRRLFSIRTNALARE | Y | N | N |                                                   |                    |
| FDLFLFSNGAVVWWG | Y | Y | Y | FDLFLFSNGAVVWWG                                   | Dikhit et al. 2017 |
| TLGFQPLAVEPALDR | S | N | N |                                                   |                    |
| NCFDLFLFSNGAVVW | Y | N | Y | FDLFLFSNGAVVWWG                                   | Dikhit et al. 2017 |
| RVRLRRLFSIRTNAL | Y | N | N |                                                   |                    |
| LLALILLGGIGAVGY | N | N | N |                                                   |                    |
| YPVYPFLASNAALLN | Y | N | Y | VYPFLASNAALLNLI, YPVYPFLASNAALLN                  | Dikhit et al. 2017 |
| LPSFHAMSAFHSAAK | N | N | N |                                                   |                    |
| NAALLNLIPSLLYRV | S | N | Y | VYPFLASNAALLNLI, YPVYPFLASNAALLN                  | Dikhit et al. 2017 |
| VYPFLASNAALLNLI | Y | N | Y | VYPFLASNAALLNLI, YPVYPFLASNAALLN                  | Dikhit et al. 2017 |
| RALLALILLGGIGAV | N | N | N |                                                   |                    |
| AALLNLIPSLLYRVQ | Y | N | Y | VYPFLASNAALLNLI                                   | Dikhit et al. 2017 |
| LQVFTAICASFAHGA | Y | Y | N |                                                   |                    |
| FPFFSGVAPIVASWF | Y | Y | N |                                                   |                    |
| ERVFRYLQVFTAICA | Y | N | N |                                                   |                    |
| KDDFPFFSGVAPIVA | Y | N | N |                                                   |                    |
| DFPFFSGVAPIVASW | Y | N | N |                                                   |                    |
| LESFFVLFGKASKRL | Y | Y | N |                                                   |                    |
| FFVLFGKASKRLKWS | Y | Y | N |                                                   |                    |
| FRYLQVFTAICASFA | Y | N | N |                                                   |                    |
| SRGFSAELSAALVVS | Y | Y | N |                                                   |                    |
| RGFSAELSAALVVSF | Y | Y | N |                                                   |                    |
| LALLIMLYALIATQF | N | N | Y | IMLYALIATQFSDDA, LALLIMLYALIATQF, LIMLYALIATQFSDD | Dikhit et al. 2017 |

|                 |   |   |   |                                                      |                    |
|-----------------|---|---|---|------------------------------------------------------|--------------------|
| LIMLYALIATQFSDD | N | N | Y | IMLYALIATQFSDDA, LALLIMLYALIATQF,<br>LIMLYALIATQFSDD | Dikhit et al. 2017 |
| IMLYALIATQFSDDA | N | N | Y | IMLYALIATQFSDDA, LALLIMLYALIATQF,<br>LIMLYALIATQFSDD | Dikhit et al. 2017 |
| VSVLALLIMLYALIA | N | N | Y | IMLYALIATQFSDDA, LALLIMLYALIATQF,<br>LIMLYALIATQFSDD | Dikhit et al. 2017 |
| VLALLIMLYALIATQ | N | N | Y | IMLYALIATQFSDDA, LALLIMLYALIATQF,<br>LIMLYALIATQFSDD | Dikhit et al. 2017 |
| VSILRQLLSVTAHTH | Y | N | N |                                                      |                    |
| KVAVSILRQLLSVTA | Y | N | N |                                                      |                    |
| GISFSRAFAANIESA | Y | Y | N |                                                      |                    |
| YQFYHRARSYVIFTT | Y | N | N |                                                      |                    |

<sup>1</sup> Reported assays:

Agallou et al. (2014): <sup>3</sup>H-thymidine proliferation, ELISA IL-10 release, ICS IFN $\gamma$  release and IL-4 release / *Mus musculus* BALB/c

Agallou et al. (2017): cytometric bead array for IFN $\gamma$ , TNF $\alpha$ , IL-2, IL-4, IL-10 release, <sup>3</sup>H-thymidine proliferation, ELISA IL-10 release, ICS IFN $\gamma$  release, IL-4 release / *Mus musculus* BALB/c

Basu et al. (2007): ELISPOT IFN $\gamma$  / *Homo sapiens*

Delgado et al. (2003): <sup>3</sup>H-thymidine proliferation, ELISA IFN $\gamma$  release, ELISA IL-4 / *Homo sapiens*

Dikhit et al. (2017): ICS IFN $\gamma$  release, ICS IL-10 release / *Homo sapiens*

Jensen et al. (1998): <sup>3</sup>H-thymidine proliferation / *Homo sapiens*

Koutsoni et al. (2017): <sup>3</sup>H-thymidine proliferation / *Mus musculus* BALB/c

Naouar et al. (2016): cellular MHC/direct/fluorescence qualitative binding / *Homo sapiens*

**Table S4. Peptides with positive experimental results in IEDB, reported in studies exclusively conducted on *L. braziliensis* or *L. panamensis*.**

| Peptide               | Species                | Match in VianniaTopes | Allele coverage | Predicted alleles                                      |
|-----------------------|------------------------|-----------------------|-----------------|--------------------------------------------------------|
| AYIDGHVTI             | <i>L. braziliensis</i> | AYIDGHVTI             | 3               | HLA-A*24:02<br>HLA-C*04:01<br>HLA-C*07:02              |
| AYLASCDFI             | <i>L. braziliensis</i> | AYLASCDFI             | 3               | HLA-A*24:02<br>HLA-C*04:01                             |
| IYVSYADLI             | <i>L. braziliensis</i> | IYVSYADLI             | 2               | HLA-A*24:02<br>HLA-C*04:01<br>HLA-C*07:02              |
| KYQHSTEML             | <i>L. braziliensis</i> | KYQHSTEML             | 3               | HLA-A*24:02<br>HLA-C*04:01<br>HLA-C*07:02              |
| SYMGYFQNI             | <i>L. braziliensis</i> | SYMGYFQNI             | 3               | HLA-A*24:02<br>HLA-C*04:01<br>HLA-C*07:02              |
| TYQRVYATL             | <i>L. braziliensis</i> | TYQRVYATL             | 3               | HLA-A*24:02<br>HLA-C*04:01<br>HLA-C*07:02              |
| VYLSFGFRL             | <i>L. braziliensis</i> | VYLSFGFRL             | 3               | HLA-A*24:02<br>HLA-C*04:01<br>HLA-C*07:02              |
| WYLATHSLI             | <i>L. braziliensis</i> | WYLATHSLI             | 3               | HLA-A*24:02<br>HLA-C*04:01<br>HLA-C*07:02              |
| DEEFNKKMQEQNAKFFADKP  | <i>L. panamensis</i>   | MQEQNAKFF             | 1               | HLA-C*04:01                                            |
| EHYDKFERMIKEHTEKFNKK  | <i>L. panamensis</i>   | DKFERMIKEHTEKFN       | 1               | HLA-DRB1*08:02                                         |
| FADKPDESTLSPEMKEHYDK  | <i>L. panamensis</i>   | DKPDESTLSPEMKEH       | 1               | HLA-DQA1*04:01/DQB1*04:02                              |
| FKHKFAELLEQQKAAQYPSK  | <i>L. panamensis</i>   | HKFAELLEQQKAAQY       | 1               | HLA-DRB1*08:02                                         |
| KFNKKMHEHSEHFHKHFAEL  | <i>L. panamensis</i>   | MHEHSEHFHKHFAEL       | 1               | HLA-DPA1*03:01/DPB1*04:02                              |
| MATTYEEFAAKLDRDLDEEFN | <i>L. panamensis</i>   | TYEEFAAKLDRLDEE       | 2               | HLA-DQA1*03:01/DQB1*03:02<br>HLA-DQA1*04:01/DQB1*04:02 |
